# Supplementary material for: Multigene methylation analysis of enriched circulating tumor cells associates with poor progression-free survival in metastatic breast cancer patients
Source: PubMed Central journal article supplement (PMC5696198; doi:10.18632/oncotarget.21426), 2017-09-30
Supplement: oncotarget-08-92483-s001.pdf [file oncotarget-08-92483-s001.pdf]

## Multigene methylation analysis of enriched circulating tumor cells associates with poor progression-free survival in metastatic breast cancer patients

### SUPPLEMENTARY MATERIALS

Supplementary Table 1: PCR and pyrosequencing primers

| Primer name         | 5' to 3' sequence                         | PCR product (bp) | # CpGs |
|---------------------|-------------------------------------------|------------------|--------|
| <i>AKR1B1</i> Fw    | TGAGTAGGAGAAGGTTTGTATGGTT                 | 172              | 13     |
| <i>AKR1B1</i> Rev   | Biotin-CACCCCAACCCAACCAATCA               |                  |        |
| <i>AKR1B1</i> S     | AGTAAGGTGAGGTTTTGG                        |                  |        |
| <i>BMP6</i> Fw      | GTAAAGGGGTAAATTTTATGGTGGT                 | 393              | 11     |
| <i>BMP6</i> Rev     | Biotin-CCCTCAATCCTTATCTCTCATAATC          |                  |        |
| <i>BMP6</i> S       | TTATTTAGTAGTTAGGGAGAG                     |                  |        |
| <i>CST6</i> Fw      | GAGGTAGAATGAGATTAGGGTTAGGT                | 235              | 15     |
| <i>CST6</i> Rev     | Biotin-CCCCTCCACCTCCTAAACTCCCTA           |                  |        |
| <i>CST6</i> S       | GTTAGTGTAGTAGGAGTTTTTAGA                  |                  |        |
| <i>HIST1H3C</i> Fw  | AGGAGGTTTGTGAGGTTTAT                      | 147              | 5      |
| <i>HIST1H3C</i> Rev | Biotin-AAAAAAACCAACAACTTATACCCTT<br>TCCC  |                  |        |
| <i>HIST1H3C</i> S   | TGAGGTTTATTTGGTGGGATT                     |                  |        |
| <i>HOXB4</i> Fw     | TGTAAAGTTTTAGGGGTGGGAG                    | 145              | 8      |
| <i>HOXB4</i> Rev    | Biotin-TCCCTACCCCAAAACCCCTACA             |                  |        |
| <i>HOXB4</i> S      | GGGTGGGAGGGGGAA                           |                  |        |
| <i>ITIH5</i> Fw     | TTGAGGGAGAGGAAGAAAGAG                     | 103              | 5      |
| <i>ITIH5</i> Rev    | Biotin-TTGAGGGAGAGGAAGAAAGAG              |                  |        |
| <i>ITIH5</i> S      | GGAGAGGAAGAAAGAGT                         |                  |        |
| <i>NEUROD1</i> Fw   | AGTAAGGAGTGGGGAGAAGTG                     | 239              | 12     |
| <i>NEUROD1</i> Rev  | Biotin-CCTAAACAATAATAATCTCATAACCCT<br>AAA |                  |        |
| <i>NEUROD1</i> S    | ATTAATTGGGTTATATAATTTG                    |                  |        |
| <i>RASSF1</i> Fw    | AGGGAAGGAAGGGTAAGG                        | 268              | 10     |
| <i>RASSF1</i> Rev   | Biotin-CCAACCTCCCCCACTCAATAAACTCA<br>AACT |                  |        |
| <i>RASSF1</i> S     | GGATTTTGGGGGAGG                           |                  |        |
| <i>SOX17</i> Fw     | TTTTATAGGGGATATGAAGGTGAAGG                | 204              | 15     |
| <i>SOX17</i> Rev    | Biotin-AACTCACCCAACATCTTACT               |                  |        |
| <i>SOX17</i> S      | ATATGAAGGTGAAGGG                          |                  |        |

Fw forward, Rev Reverse, S Sequencing.

**Supplementary Table 2: Summary of methylation results of all nine genes and CTC count in each patient (N=37)**

See Supplementary File 1
